# Supplementary material for: Thermo-responsive injectable hydrogels from linear and star-shaped block copolymers composed of amino acid-derived vinyl polymer and poly(ethylene glycol) for biomedical applications
Source: Royal Society of Chemistry journal article supplement (doi:10.1039/d3ma00954h), 2023-12-13
Supplement: d3ma00954h1.pdf [file d3ma00954h1.pdf]

[Supplementary Information]

Thermo-responsive injectable hydrogels from linear and star-shaped block copolymers composed of amino acid-derived vinyl polymer and poly(ethylene glycol) for biomedical applications

Mitsuki Nakamura<sup>1</sup>, Shin-nosuke Nishimura<sup>1\*</sup>, Nobuyuki Higashi<sup>1</sup>, Tomoyuki Koga<sup>1\*</sup>

1) *Department of Molecular Chemistry and Biochemistry, Faculty of Science and Engineering,  
Doshisha University, Kyotanabe, Kyoto 610-0321, JAPAN*

**Corresponding Author**

\*Email: tkoga@mail.doshisha.ac.jp (T. K.)

\*Email: shnishim@mail.doshisha.ac.jp (S. N.)

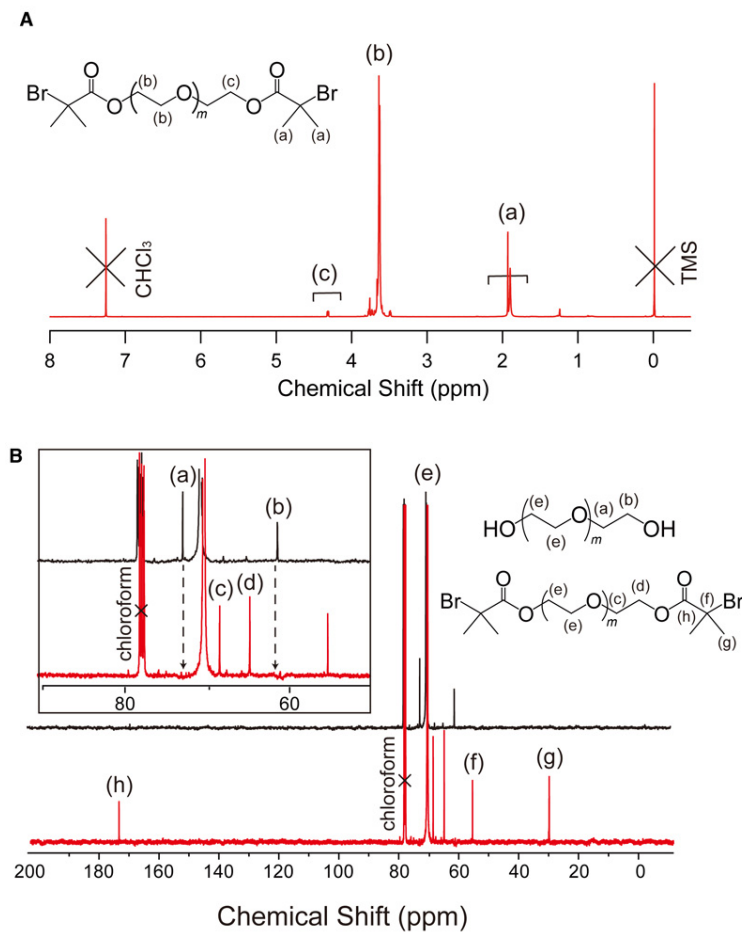

**Figure S1.** (A)  $^1\text{H}$ -NMR spectrum of the macroinitiator, PEG- $\text{Br}_2$ , and (B)  $^{13}\text{C}$ -NMR spectra of the PEG- $\text{Br}_2$  (red line) and PEG (black line) in  $\text{CDCl}_3$  at  $25^\circ\text{C}$  (Internal standard: TMS). The inset in (B) shows the magnitude spectra.

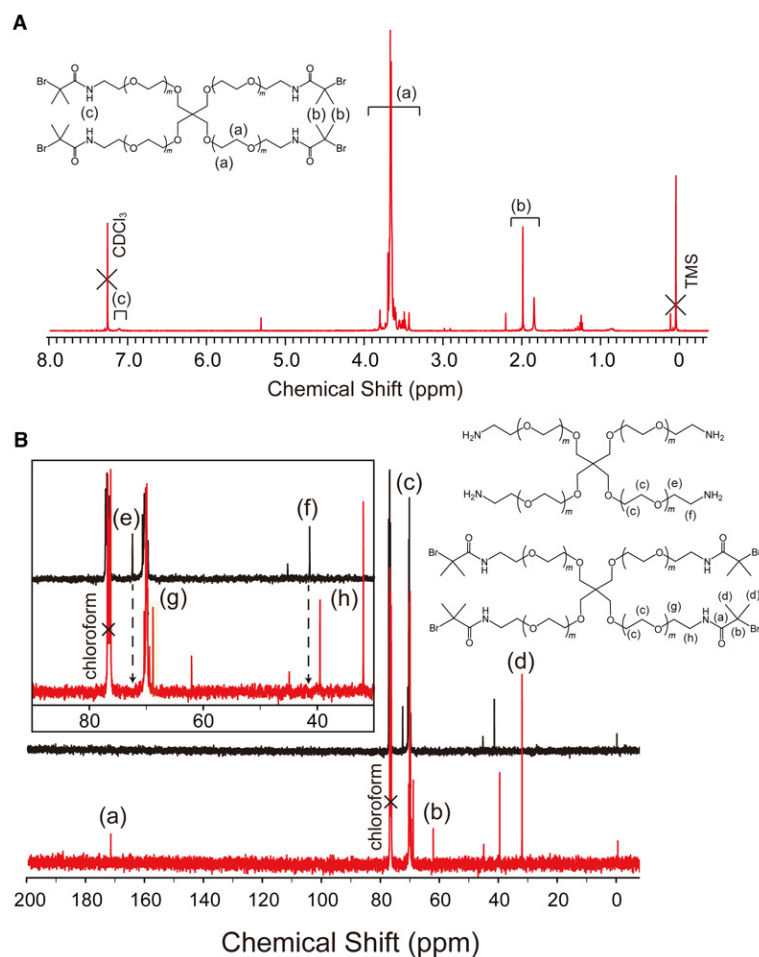

**Figure S2.** (A)  $^1\text{H}$ -NMR spectrum of the macroinitiator, 4-arm PEG- $\text{Br}_4$ , and (B)  $^{13}\text{C}$ -NMR spectra of the 4-arm PEG- $\text{Br}_4$  (red line) and 4-arm PEG- $\text{NH}_2$  (black line) in  $\text{CDCl}_3$  at  $25^\circ\text{C}$  (Internal standard: TMS). The inset in (B) shows the magnitude spectra.

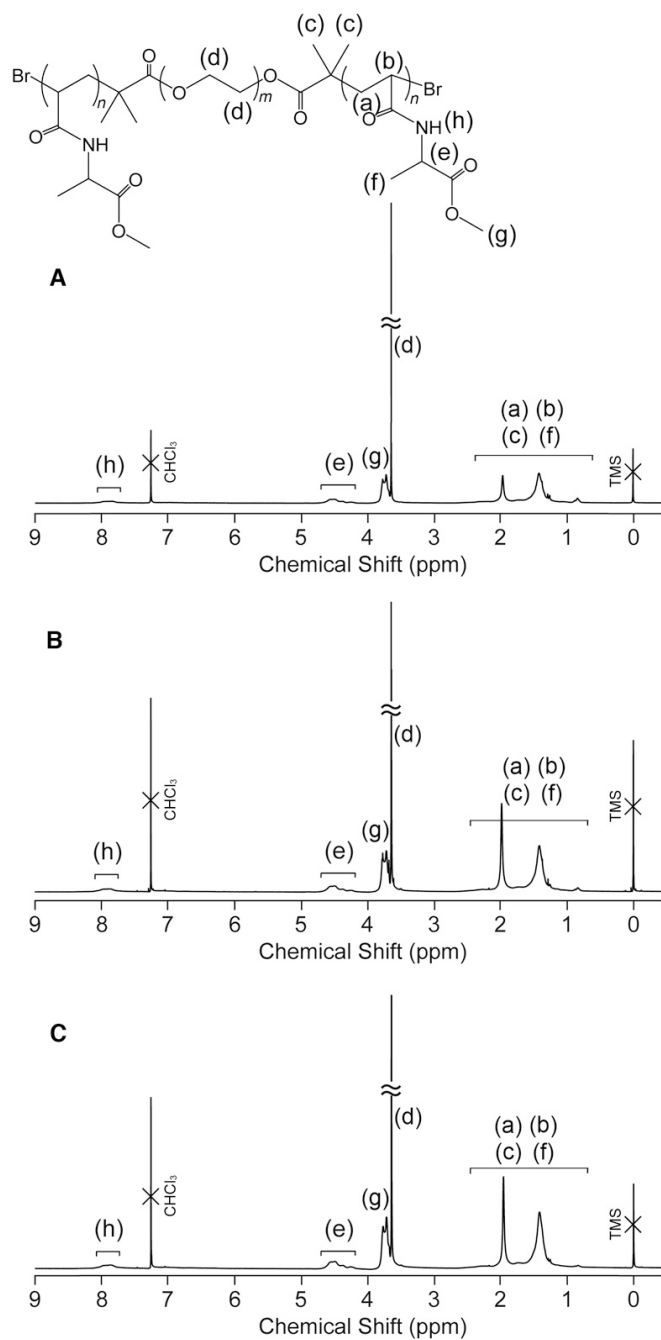

**Figure S3.**  $^1\text{H-NMR}$  spectra of the linear-type PNAAMe/PEG block copolymers,  $1_n$ ;  $n=101$  (A), 250 (B), and 321 (C) in  $\text{CDCl}_3$  at  $25^\circ\text{C}$  (Internal standard: TMS).

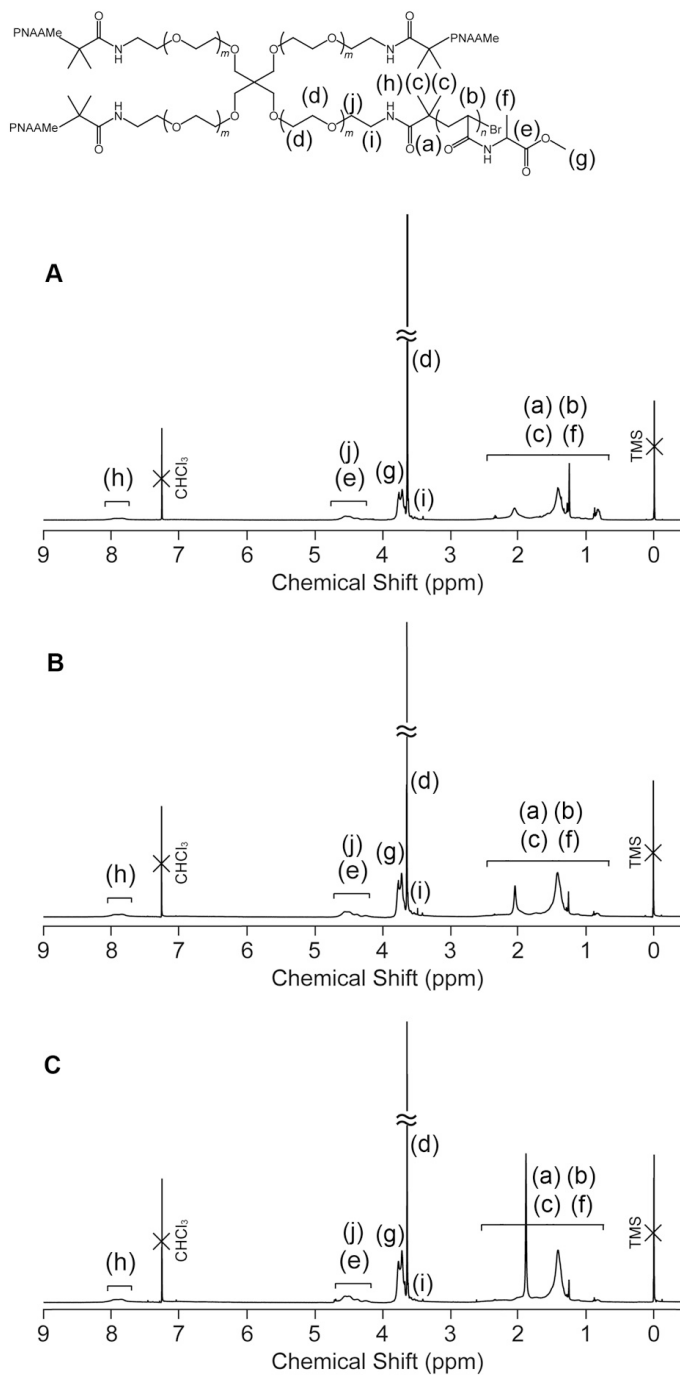

**Figure S4.**  $^1\text{H-NMR}$  spectra of the star-shape PNAAME/PEG block copolymers,  $\mathbf{2}_n$ ;  $n=28$  (A), 66 (B), and 118 (C) in  $\text{CDCl}_3$  at 25 °C (Internal standard: TMS).

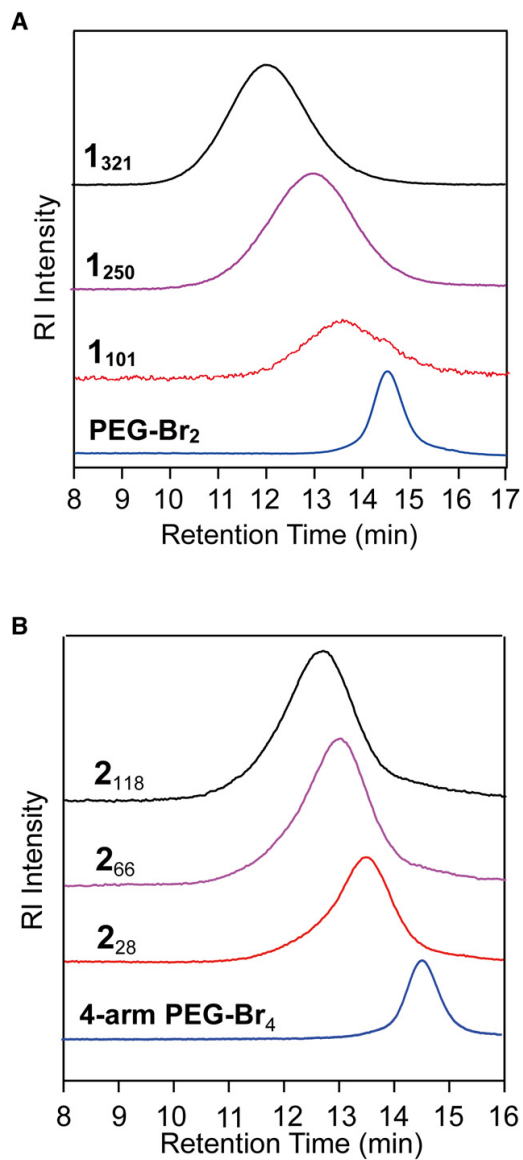

**Figure S5.** SEC charts (eluent: DMF (10 mM LiBr), 40 °C) of linear-type ( $\mathbf{1}_n$ ) (A) and star-type ( $\mathbf{2}_n$ ) (B) PNAAMe/PEG block copolymers. In these figures, SEC charts for corresponding macroinitiators were also included for comparison.

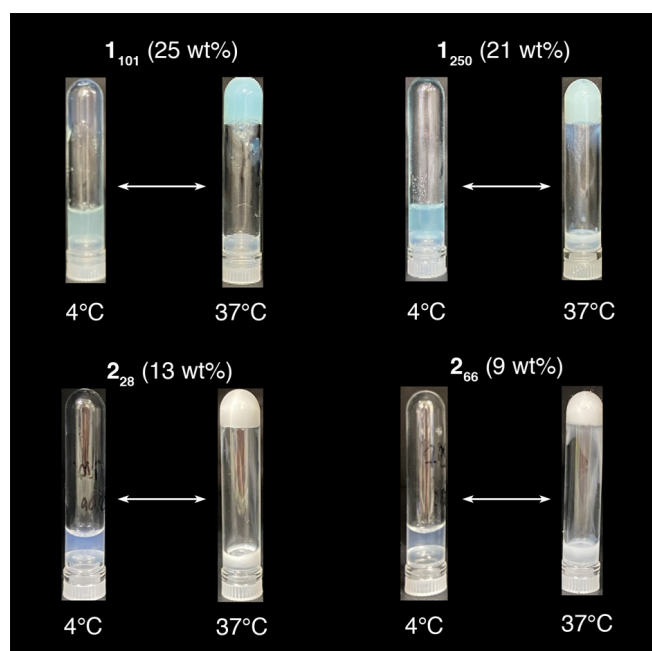

**Figure S6.** Photographs of thermo-reversible hydrogel formations of **1<sub>101</sub>**, **1<sub>250</sub>**, **2<sub>28</sub>**, and **2<sub>66</sub>** at various concentrations indicated.

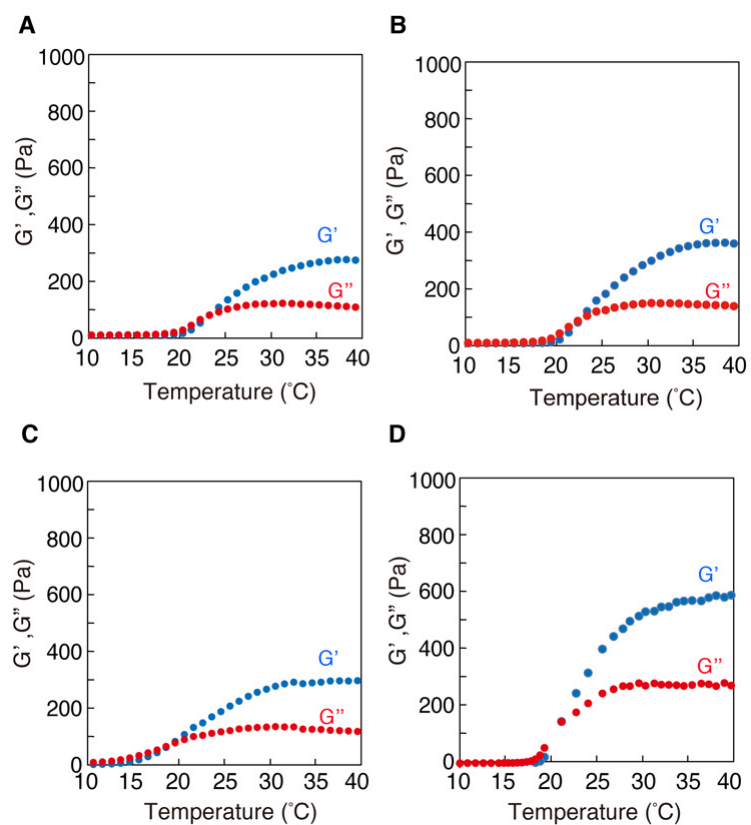

**Figure S7.** Temperature dependences of the storage ( $G'$ ) and loss ( $G''$ ) moduli for **1**<sub>101</sub> (A), **1**<sub>250</sub> (B), **2**<sub>28</sub> (C), and **2**<sub>66</sub> (D) from 10  $^{\circ}\text{C}$  to 40  $^{\circ}\text{C}$  at 6.3 rad/s and 1% strain. [polymer]=25 wt%.



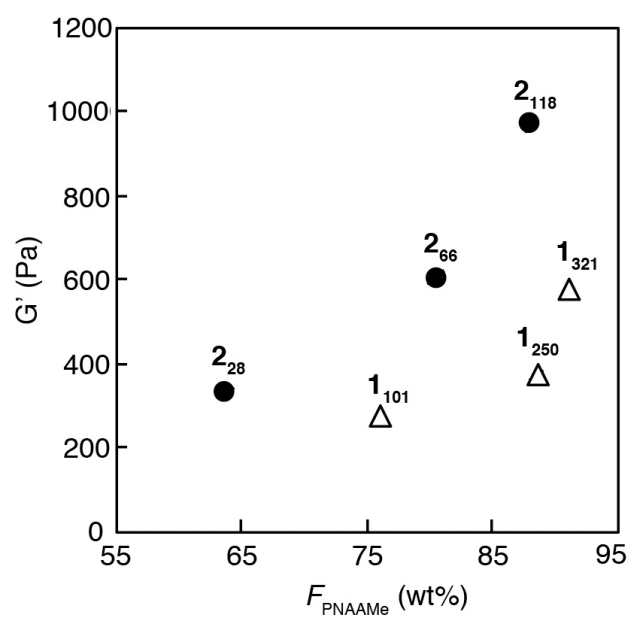

**Figure S8.** Plots of storage moduli ( $G'$ ) of  $1_n$  (open triangle) and  $2_n$ -hydrogel (closed circle) (37°C, 6.3 rad/s, and strain 1%) as a function of  $F_{\text{PNAAMe}}$  values (PNAAMe length). [polymer]=25 wt%.

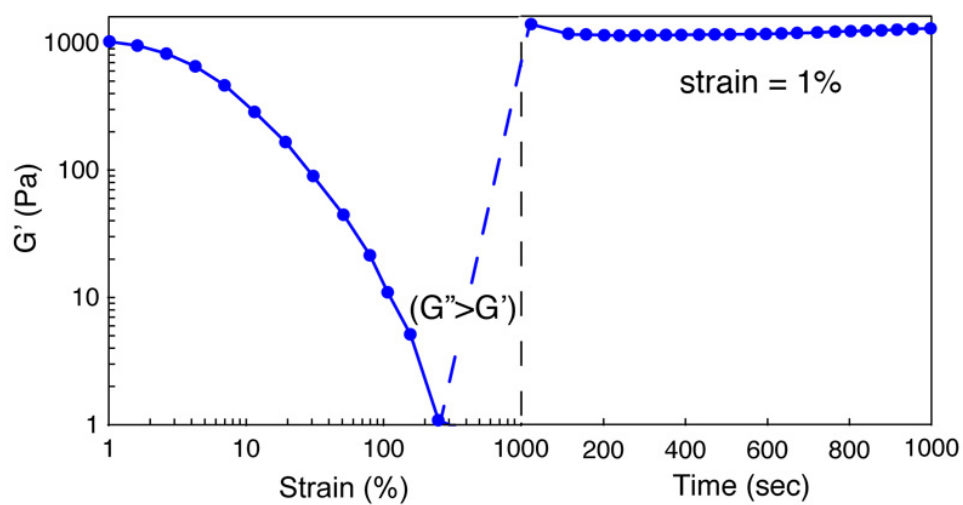

**Figure S9.** Recovery of stiffness ( $G'$ ) of  $2_{118}$ -hydrogel (25 wt%) at 1% strain amplitude after large-amplitude oscillatory breakdown.

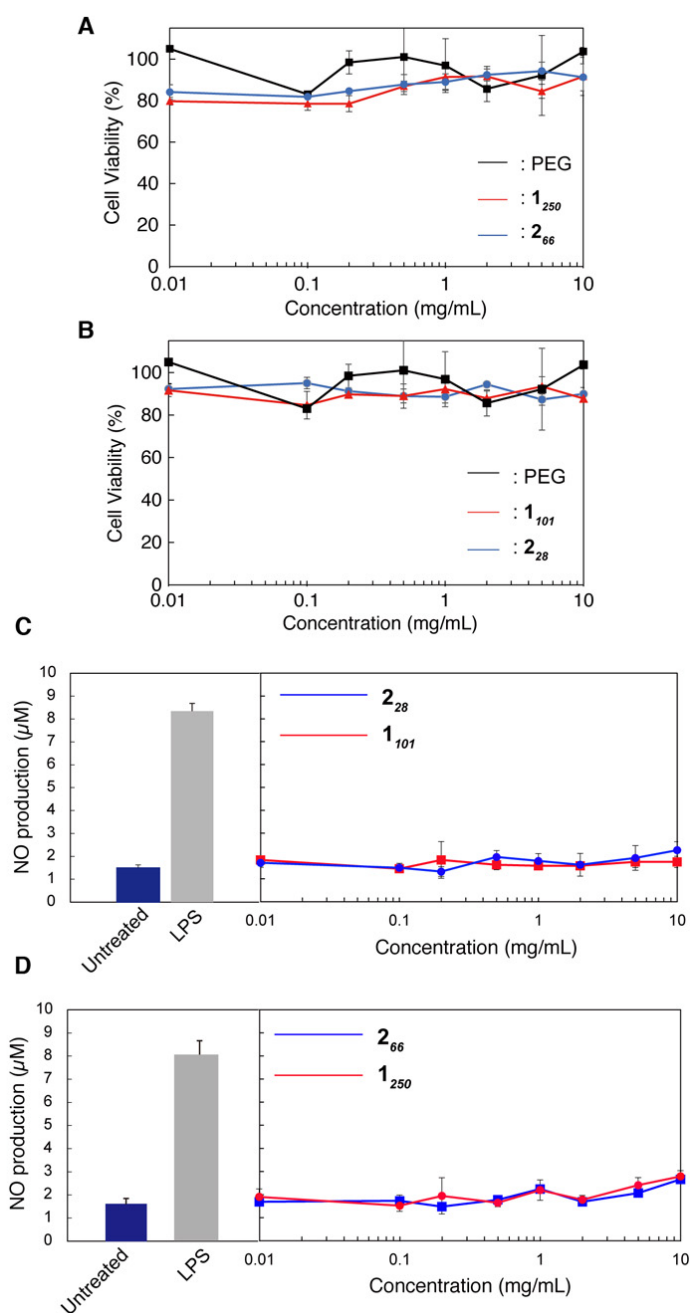

**Figure S10.** Biocompatibility tests for the PNAAMe/PEG block copolymers, **1<sub>101</sub>**, **1<sub>250</sub>**, **2<sub>28</sub>**, and **2<sub>66</sub>**. (A and B) Cell viability (RAW264.7) cultured for 24 h in the presence of the polymers (0.01–10 mg/mL) using the WST-8 assay. (C and D) NO production test of the polymers using RAW264.7 cultured for 24 h.
